# Supplementary material for: COVID-19 experiences of small-scale fishing households: The case of Lake Victoria, Kenya
Source: Frontiers journal article supplement (doi:10.3389/fsufs.2022.987924), 2023-02-03
Supplement: Table_1.DOCX [file Table_1.DOCX]

**SUPPLEMENTAL TABLES**

| Table A1: Respondent and Household Characteristics | |  |
| --- | --- | --- |
|  | Mean | SD |
| Female | 90% | 30% |
| Age | 42 | 16 |
| Marital status: |  |  |
| Married | 60% | 35% |
| Separated | 14% | 27% |
| Never married | 8% | 39% |
| Widow | 18% | 50% |
| Education: |  |  |
| None or some primary | 47% | 50% |
| Primary or some secondary | 40% | 49% |
| Secondary completed | 10% | 30% |
| Post-secondary | 3% | 18% |
| Primary occupation |  |  |
| Trader | 30% | 46% |
| Fisher | 9% | 29% |
| Other occupation | 61% | 49% |
| Usual household size (members) | 5.6 | 2.3 |
| Dependency share (dependents/household size) | 44% | 22% |
| Household owns livestock | 86% | 35% |
| Household owns land | 89% | 32% |
| N | 88 |  |

| Table A2: COVID-19 worry correlation matrix | | | |  |  |
| --- | --- | --- | --- | --- | --- |
|  | Infection worry | Policy worry | Cases | Deaths | Stringency index |
| Infection worry | 1 |  |  |  |  |
| Policy worry | 0.492*** | 1 |  |  |  |
| Cases | 0.298*** | 0.0787** | 1 |  |  |
| Deaths | 0.290*** | 0.0950** | 0.825*** | 1 |  |
| Stringency index | 0.204*** | 0.166*** | -0.157*** | 0.0447 | 1 |
| * p<0.05, ** p<0.01, *** p<0.001. Sources: Cases, deaths and stringency data obtained from the COVID-19 Data Repository by the Center for Systems Science and Engineering (CSSE) at Johns Hopkins University. | | | | | |

Table A3: Focus group findings about specific COVID-19 regulations and policies that affected various aspects of the lake’s fishery

| Restrictive policies | Fishing activities and working conditions | Food security, nutrition and safety | Post-harvest, market, and trade | Vulnerable social groups | Fisheries management, research, and development |
| --- | --- | --- | --- | --- | --- |
| Movement restrictions (curfew & lock-down of some counties) | X | X | X | X | X |
| Mandatory use of PPEs (masks and gloves) | X | X | X | X | X |
| Prohibition of social gatherings (schools, places of worship, meetings/workshops) | X | X | X | X | X |
| Maintenance of at least 1 m social distance | X | X | X | X | X |
| Working from home | X | X | X | X | X |
| Sanitary measures (handwashing, sanitizing) |  |  | X |  |  |

| Table A4: Survey questions and choice sets | | |
| --- | --- | --- |
| Topic | Survey Question(s) | Choice sets and variable construction |
|  |  |  |
| COVID-19 worry | I have been worried/concerned about myself or a member of my household becoming infected with the coronavirus | Never, Sometimes, Often, Always |
| COVID-19 policy worry | I have been worried/concerned about how the measures to control the COVID-19 pandemic are affecting me and/my family | Never, Sometimes, Often, Always |
|  |  |  |
| Fishing participation | How many days did you or members or your household go fishing in the last 7 days? | Participation = 1 if household fished >= 1 day in past week. |
| Trading participation | How many days did you or members or your household process fish in the last 7 days? How many days did you or members or your household sell fish in the last 7 days? | Participation = 1 if household traded or sold >= 1 day in past week |
| Time spent fishing | How many days did you or members or your household go fishing in the last 7 days? In the last 7 days, on average, how long (hours) did you or members of your household spend on a fishing outing in a day? | Total hours fished per week = average hours per day x number of days |
| Time spent trading/processing | How many days did you or members or your household process fish in the last 7 days? In the last 7 days, on average, how long (hours) did you or members of your household spend processing fish on a given day? How many days did you or members or your household sell fish in the last 7 days? In the last 7 days, on average, how long did you or members of your household spend selling fish on a given day? | Total hours sold per week = average selling hours per day x number of days  Total hours processed per week = average processing hours per day x number of days |
| Changes in time spent fishing compared to this time last year | In the past 30 days, how often did your household experience the following or use one or more of the following actions in response to the COVID-19 pandemic? Gone fishing more times or stayed out longer than we usually do Gone fishing less times or stayed out shorter than we usually do | Never, Sometimes, Often, Always |
| Changes in time spent trading compared to this time last year | In the past 30 days, how often did your household experience the following or use one or more of the following actions in response to the COVID-19 pandemic? Processing/selling fish more times or for longer than we usually do Processing/selling fish less times or for shorter than we usually do | Never, Sometimes, Often, Always |
| Changes in catch quantity compared to this time last year | In the past 30 days, how often did your household experience the following or use one or more of the following actions in response to the COVID-19 pandemic? Quantity of fish we usually catch has reduced compared to this time last year Quantity of fish we usually catch has increased compared to this time last year | Never, Sometimes, Often, Always |
| Changes in processed/sold quantity compared to this time last year | In the past 30 days, how often did your household experience the following or use one or more of the following actions in response to the COVID-19 pandemic? Quantity of fish we processed/sold has reduced compared to this time last year Quantity of fish we processed/sold has increased compared to this time last year | Never, Sometimes, Often, Always |
| Fishers selling rather than eating | In the past 30 days, how often did your household experience the following or use one or more of the following actions in response to the COVID-19 pandemic? Sold fish we caught instead of eating it more often than usual | Never, Sometimes, Often, Always |
| Fishers eating rather than selling | In the past 30 days, how often did your household experience the following or use one or more of the following actions in response to the COVID-19 pandemic? Ate fish we caught instead of selling it more often than usual | Never, Sometimes, Often, Always |
| Traders selling rather than eating | In the past 30 days, how often did your household experience the following or use one or more of the following actions in response to the COVID-19 pandemic? Sold fish instead of eating it more often than usual | Never, Sometimes, Often, Always |
| Traders eating rather than selling | In the past 30 days, how often did your household experience the following or use one or more of the following actions in response to the COVID-19 pandemic? Ate fish instead of selling it more often than usual | Never, Sometimes, Often, Always |
| Fishers spoilage due to inability to sell | In the past 30 days, how often did your household experience the following or use one or more of the following actions in response to the COVID-19 pandemic? Fish was spoiled because it could not be sold more often than usual | Never, Sometimes, Often, Always |
| Traders spoilage due to inability to sell | In the past 30 days, how often did your household experience the following or use one or more of the following actions in response to the COVID-19 pandemic? Fish was spoiled because it could not be sold more often than usual | Never, Sometimes, Often, Always |
|  |  |  |
| Food prices changes, disaggregated by item | For these next set of questions, I would like to know your thoughts about how the prices of the following products have changed: In the past 30 days, how has the price of ITEM such as grains, cereals or starchy foods changed? Items:  Staples such as grains, cereals or starchy foods  Fruits and vegetables Fish Meat or chicken Eggs Dairy products such as milk, etc Sugar and sweetened beverages Oil | Price remained unchanged; Price increased; Price reduced; Not observed/don't know |
| Household Food Insecurity Access Scale (HFIAS) | For each of the following questions, consider what has happened in the past 30 days. Please answer whether this happened never, rarely (once or twice), sometimes (3-10 times), or often (more than 1- times) in the past 30 days, starting from today? Did you worry that your household would not have enough food? Were you or any household member not able to eat the kinds of foods you preferred because of a lack of resource? *Clarification: Foods you preferred might include meat, eggs, or big fish like tilapia*. Did you or any household member eat just a few kinds of food, such as only ugali and sukuma wiki, day after day due to a lack of resources Did you or any household member eat food that you preferred not to eat because a lack of resources to obtain other types of food? *Clarification: A food you preferred not to eat may include dagaa, cassava, or porridge for lunch*  Did you or any household member have to eat less at any meal than you felt you needed to because there was not enough food? Did you or any other household member eat fewer meals in a day because there was not enough food? Was there ever no food at all in your household, granaries or gardens because there were not resources to get more? Did you or any household member go to sleep at night hungry because there was not enough food? Did you or any household member go a whole day and night without eating anything because there was not enough food? Were you or any household member not able to eat the kinds of foods you prefered because you were unable to find these foods to buy from the markets or shops? *Clarification: Foods you preferred might include meat, eggs, or big fish like tilapia*  Was there ever no food at all in your household, granaries or gardens because you were unable to find these foods to buy from the markets or shops? | Never; Rarely 1-2 times; Sometimes 3-10 times; Often 10+ times  HFIAS calculated per: Coates, Jennifer, Anne Swindale and Paula Bilinsky. 2007. Household Food Insecurity Access Scale (HFIAS) for Measurement of Household Food Access: Indicator Guide (v. 3). Washington, D.C.: FHI 360/FANTA. |
| Consumption of different food groups in past 7 days Household Dietary Diversity Score (HDDS) | For each food I ask about, please tell me how many days in the last 7 days you think you and members of your household ate that food. I would like to know if you ate the food, even if it was combined with other foods in a recipe. Any maize, wheat, sorghum, or millet or food made from them such as porridge, ugali, cooked rirce, chapati, bread, maize (flour, roasted, boiled), spaghetti, oats, etc. How many days in the last 7 days?  Any cassava, plantain, potatoes, sweet potatoes, yams, taro roots, or food made from these? How many days in the last 7 days?  Any member of your household have: any vegetable such as sukuma wiki, dek, osuga, cabbage, cowpea leaves, spinach, pumpkin, leaves, Jews-mallow, tomato, onion, carrot, squash, pumpkin or any food made from these? How many days in the last 7 days?  Any fruits such as mango, papaya, banana, avocado, oranges, watermelon, pineapple or any other fruits? How many days in the last 7 days?  Any type of meat, including from birds or animals such as beef, goat, lamb, pork, chicken, duck? How many days in the last 7 days?  Any organ meat including liver, kidney, heart, etc? How many days in the last 7 days?  Any type of egg? How many days in the last 7 days?  Any dishes made with beans, groundnut, green gram, cowpeas, peas, lentils, other nuts? How many days in the last 7 days? Any milk (liquid, fresh or powder), cheese, yogurt, or other food made with milk? How many days in the last 7 days?  Any vegetable oil, palm oil, red palm fruit, sunflower oil, blue band margarine, butter, ghee, or foods made with these? How many days in the last 7 days?  Sugary foods such as sugar, juggery, honey, chocolates, sweets, candies, sweet pastries, cakes, or sweet biscuits? How many days in the last 7 days?  Sweet beverages such as coca-cola, fanta? How many days in the last 7 days?  Other foods served in small servings such as spices, chili, garlic, royco, maggi cubes? How many days in the last 7 days?  Coffee, tea, alcoholic beverages, etc. How many days in the last 7 days? | HDDS calculated per: Swindale, Anne, and Paula Bilinsky. 2006. Household Dietary Diversity Score (HDDS) for Measurement of Household Food Access: Indicator Guide (v.2). Washington, D.C.: FHI 360/FANTA. |
| Coping strategies | In the past 30 days, how often did your household use one or more of the following actions in response to the COVID-19 pandemic? In the past 30 days, how often did your household use one or more of the following actions in response to the COVID-19 pandemic? Borrowed from or relied on a friend/relative for food  Purchased food on credit Harvested crops earlier than you normally would Consumed seed or stock held for next season Reduced the portion size of food at mealtimes Reduced amount adults consume so that children can have enough to eat Relied on food distribution by the government or other bodies Built or extended a vegetable garden to increase the food grown for my household Built or extended a farmland to increase the food grown for my household Bought food in larger or smaller quantities to store |  |
